# Supplementary material
Source: PubMed Central journal article supplement (PMC4701660)

Appendix 2 (as supplied by the authors): matrix used for combining data and social indicators of the Pampalon index

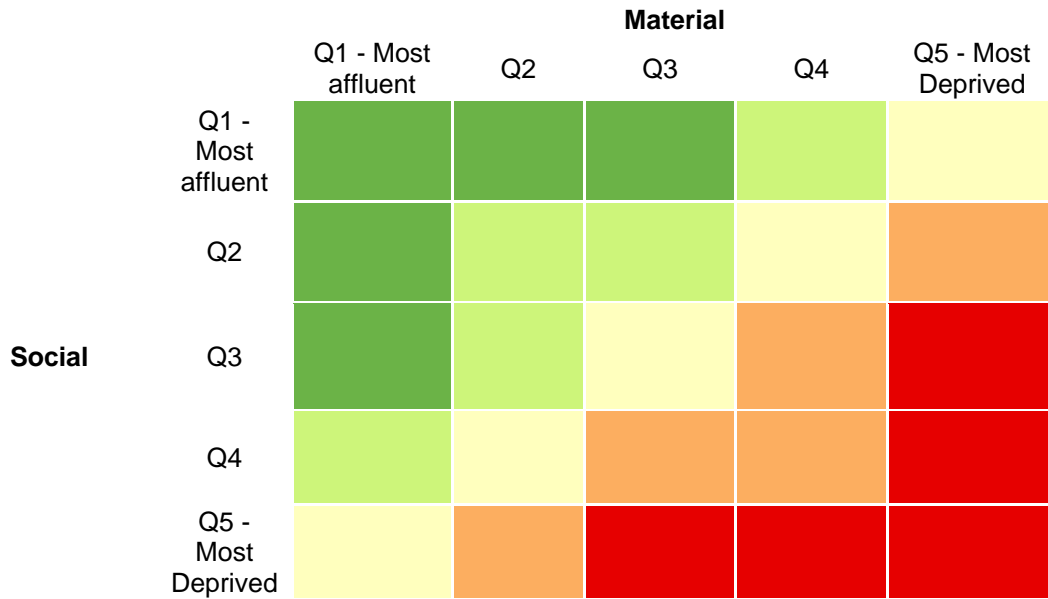

**Total Deprivation Scores**

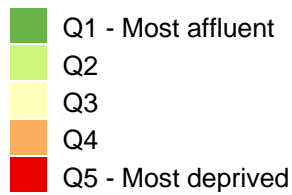

Supplement: supp_3.4.E366_2015-0049-2-at.pdf [file supp_3.4.E366_2015-0049-2-at.pdf]
