# Supplementary material
Source: PubMed Central journal article supplement (PMC4701660)
Supplement: supp_3.4.E366_2015-0049-4-at.pdf [file supp_3.4.E366_2015-0049-4-at.pdf]

**Appendix 4 (as supplied by the authors): Overall rates, rate ratios, rate differences, % change in rate ratio, % change in rate difference and area-level concentration curve for each health outcome used in the Saskatoon health inequities analytic approach**

| Hospitalizations Data |               |      |          |      |      |          |      |      |          |      |      |          |
|-----------------------|---------------|------|----------|------|------|----------|------|------|----------|------|------|----------|
|                       | Rate per 1000 |      |          | DRR  |      |          | DRD  |      |          | ALCC |      |          |
|                       | 1995          | 2011 | % Change | 1995 | 2011 | % change | 1995 | 2011 | % Change | 1995 | 2011 | % Change |
| Diabetes              | 1.13          | 1.16 | ↑3%      | 1.74 | 2.75 | ↑58%*    | 0.60 | 1.31 | ↑116%    | 0.18 | 0.19 | ↑8%      |
| Heart Disease         | 5.56          | 2.37 | ↓57%*    | 1.41 | 1.75 | ↑24%*    | 1.64 | 1.43 | ↓13%     | 0.15 | 0.16 | ↑10%     |
| Stroke                | 2.41          | 1.19 | ↓51%*    | 1.67 | 2.03 | ↑21%*    | 1.24 | 0.76 | ↓39%     | 0.23 | 0.16 | ↓28%*    |
| COPD                  | 2.82          | 1.71 | ↓39%*    | 2.59 | 3.42 | ↑32%*    | 2.61 | 2.19 | ↓16%     | 0.33 | 0.28 | ↓15%*    |
| Cancer                | 8.03          | 4.66 | ↓42%*    | 1.13 | 1.18 | ↓4%      | 0.92 | 0.84 | ↓9%      | 0.13 | 0.04 | ↓68%*    |
| Injury                | 6.91          | 5.79 | ↓16%     | 1.82 | 2.35 | ↑29%*    | 4.35 | 5.11 | ↑18%     | 0.17 | 0.20 | ↑14%     |
| Mental Disorders      | 6.17          | 3.48 | ↓44%*    | 2.9  | 2.44 | ↓16%     | 6.35 | 3.28 | ↓48%     | 0.20 | 0.18 | ↓10%     |
| Self-Harm             | 0.84          | 0.39 | ↓54%*    | 5.58 | 3.58 | ↓36%     | 1.28 | 0.48 | ↓63%     | 0.28 | 0.23 | ↓17%*    |

  

| Physician Billing Data |               |       |          |      |      |          |      |      |          |      |      |          |
|------------------------|---------------|-------|----------|------|------|----------|------|------|----------|------|------|----------|
|                        | Rate per 1000 |       |          | DRR  |      |          | DRD  |      |          | ALCC |      |          |
|                        | 1996          | 2009  | % Change | 1996 | 2009 | % Change | 1996 | 2009 | % Change | 1996 | 2009 | % Change |
| Diabetes               | 5.21          | 11.2  | ↑115%*   | 8.28 | 9.91 | ↑20%     | 8.58 | 22.7 | ↑165%    | 0.40 | 0.39 | ↓4%      |
| Heart Disease          | 5.32          | 5.96  | ↑12%     | 5.02 | 7.29 | ↑45%*    | 6.93 | 11.2 | ↑62%     | 0.36 | 0.37 | ↑1%      |
| Stroke                 | 1.81          | 1.19  | ↓34%*    | 4.85 | 6.16 | ↑27%     | 2.60 | 2.26 | ↓13%     | 0.42 | 0.38 | ↓9%      |
| COPD                   | 26.7          | 20.91 | ↓22%     | 6.23 | 9.26 | ↑49%*    | 40.4 | 38.1 | ↑6%      | 0.32 | 0.37 | ↑13%     |
| Cancer                 | 5.66          | 7.54  | ↑33%     | 3.91 | 5.56 | ↑42%     | 6.13 | 11.1 | ↑81%     | 0.25 | 0.28 | ↑13%     |
| Injury                 | 62.4          | 44.5  | ↓29%*    | 5.23 | 7.41 | ↑42%*    | 85.5 | 71.4 | ↓17%     | 0.30 | 0.33 | ↑12%     |
| Mental Disorders       | 31.9          | 42.0  | ↑32%*    | 6.81 | 9.05 | ↑33%*    | 51.9 | 81.4 | ↑57%     | 0.35 | 0.38 | ↑10%     |

  

| Communicable Diseases Data |               |       |          |      |      |          |      |      |          |      |      |          |
|----------------------------|---------------|-------|----------|------|------|----------|------|------|----------|------|------|----------|
|                            | Rate per 1000 |       |          | DRR  |      |          | DRD  |      |          | ALCC |      |          |
|                            | 2004          | 2010  | % Change | 2004 | 2010 | % Change | 2004 | 2010 | % Change | 2004 | 2010 | % Change |
| Hepatitis C                | 0.81          | 0.37  | ↓54%*    | 7.84 | 11.1 | ↑42%     | 1.94 | 1.54 | ↓21%     | 0.43 | 0.51 | ↑20%*    |
| Gonorrhoea                 | 0.46          | 0.40  | ↓13%     | 8.40 | 4.79 | ↓43%     | 0.93 | 0.73 | ↓21%     | 0.40 | 0.47 | ↑19%     |
| Tuberculosis               | 0.013         | 0.064 | ↑392%    | N/A  | N/A  | N/A      | N/A  | N/A  | N/A      | 0.58 | 0.56 | ↓4%      |
| Chlamydia                  | 3.31          | 4.85  | ↑47%     | 4.22 | 2.96 | ↓30%*    | 4.94 | 5.24 | ↑6%      | 0.29 | 0.25 | ↓16%     |

Appendix to: Neudorf C, Fuller D, Cushon J, Glew R, Turner H, Ugolini C. An analytic approach for describing and prioritizing health inequalities at the local level in Canada: a descriptive study. *CMAJ Open* 2015. DOI:10.9778/cmajo.20150049. Copyright © 2015 8872147 Canada Inc. or its licensors

| Vital Statistics Data |               |       |          |      |      |          |        |       |          |      |      |          |
|-----------------------|---------------|-------|----------|------|------|----------|--------|-------|----------|------|------|----------|
|                       | Rate per 1000 |       |          | DRR  |      |          | DRD    |       |          | ALCC |      |          |
|                       | 1995          | 2009  | % Change | 1995 | 2009 | % Change | 1995   | 2009  | % Change | 1995 | 2009 | % Change |
| All-Cause Mortality   | 6.09          | 5.88  | ↓3%      | 2.28 | 2.34 | ↑3%*     | 4.61   | 5.38  | ↑17%     | 0.28 | 0.23 | ↓17%     |
| Infant Mortality      | 10.7          | 8.36  | ↓22%*    | 2.87 | 1.61 | ↓44%     | 10.7   | 3.39  | ↓69%     | 0.18 | 0.17 | ↓5%      |
| Low Birth Weight      | 66.0          | 61.5  | ↓7%      | 2.27 | 1.53 | ↓33%     | 54.5   | 27.8  | ↓49%     | 0.06 | 0.06 | →0%      |
| High Birth Weight     | 106.4         | 134.8 | ↑27%     | 0.73 | 0.95 | ↑30%*    | -33.7  | -6.54 | ↓81%     | 0.15 | 0.08 | ↓46%*    |
| Teen Pregnancy        | 87.1          | 56.6  | ↓35%*    | 4.19 | 8.63 | ↑106%*   | 113.3  | 114.3 | ↑1%      | 0.17 | 0.25 | ↑50%*    |
| Teen Abortion         | 245.4         | 195.6 | ↓20%     | 0.63 | 0.93 | ↑49%*    | -119.4 | -13.2 | ↓89%     | 0.31 | 0.21 | ↓32%*    |

| Immunizations Data |               |       |          |      |      |          |        |        |          |      |      |          |
|--------------------|---------------|-------|----------|------|------|----------|--------|--------|----------|------|------|----------|
|                    | Rate per 1000 |       |          | DRR  |      |          | DRD    |        |          | ALCC |      |          |
|                    | 2002          | 2011  | % Change | 2002 | 2011 | % Change | 2002   | 2011   | % Change | 2002 | 2011 | % Change |
| Child Immunization | 624.9         | 745.9 | ↑19%     | 0.32 | 0.76 | ↑136%*   | -312.1 | -202.9 | ↓35%     | 0.09 | 0.07 | ↓22%     |

Note. Recalculations of the percent change in overall rate, rate ratios, rate difference, and ALCC are subject to rounding error. The actual calculation was done rounding to the nearest fifth decimal.

Abbreviations: ALCC (area-level concentration coefficient), DRR (disparity rate ratio), DRD (disparity rate difference)

\* Represents a statistically significant ( $p < 0.05$ ) change.

+ N/A = There were no cases of Tuberculosis in the least deprived group.
