# Supplementary material
Source: PubMed Central journal article supplement (PMC4701660)
Supplement: supp_3.4.E366_2015-0049_Original_version.pdf [file supp_3.4.E366_2015-0049_Original_version.pdf]

1  
2  
3  
4  
5 An analytical approach for describing, prioritizing and acting on health inequities at the  
6 local level in Canada.  
7

8 Authors: Cory Neudorf<sup>1</sup> MD, MHSc, Daniel Fuller<sup>1</sup>, PhD, Jennifer Cushon<sup>1</sup>, PhD, Riley Glew<sup>1</sup>,  
9 MPH, MSc, Hollie Turner, MA, Cristina Ugolini, MPA  
10

11 1. University of Saskatchewan  
12

13 Corresponding Author:  
14 Cory Neudorf, MD, MHSc  
15 Department of Community Health & Epidemiology  
16 Health Science Building, 107 Wiggins Road  
17 University of Saskatchewan  
18 Saskatoon, Saskatchewan, Canada S7N-5E5  
19 Phone: (306) 966-2276  
20 Fax: (306) 966-7920  
21 E-mail: [cory.neudorf@usask.ca](mailto:cory.neudorf@usask.ca)  
22  
23

24 **Running Head:** Health disparity planning  
25

26 **TEXT WORD COUNT:** 2707  
27

28 **ABSTRACT WORD COUNT:** 237  
29

30 **NUMBER OF TABLES:** 2  
31

32 **NUMBER OF FIGURES:** 1  
33  
34  
35  
36  
37  
38  
39  
40  
41  
42  
43  
44  
45  
46  
47  
48  
49

**Abstract**

**Objectives:** We present the Saskatoon Health Region's health inequities analytical approach to examine health equity. This approach enables health regions prioritize action on health inequities.

**Design:** Data from hospitalizations, physician billing, reportable diseases, vital statistics, and childhood immunizations in the city of Saskatoon were analyzed in years ranging from 1995 to 2011. Data was aggregated to the dissemination area level. The Pampalon deprivation index was used as the measure of socioeconomic status. We calculated annual rates per 1000 people for each outcome; rate ratios, rate differences, area level concentration curves, and area level concentration coefficients quantified inequality. An Inequalities Prioritization Matrix (IPM) was developed to prioritize action for the outcomes demonstrating the greatest inequity.

**Main outcome measures:** The outcomes measures were cancer, intentional self-harm, COPD, mental illness, heart disease, diabetes, injury, stroke, chlamydia, tuberculosis, gonorrhoea, Hepatitis C, high birth weight, low birth weight, teen abortion, teen pregnancy, infant mortality and all cause mortality.

1  
2  
3  
4  
5  
6  
7 **Results:** The IPM showed that the first and second priorities to address related to  
8 inequities in hospitalizations are injuries and COPD. For physician billing, mental  
9 disorders and diabetes are high priority areas. Teen pregnancy and all cause mortality are  
10 the most inequitable in the vital statistics data. For STI infections, Hepatitis C is the  
11 highest priority.  
12  
13  
14  
15  
16  
17  
18

19 **Conclusions:** The health inequities analytic approach is an effective, replicable method  
20 for identifying areas of concern that require further inquiry, action planning, and  
21 evaluation to reduce health inequities.  
22  
23  
24  
25  
26  
27  
28  
29  
30  
31  
32  
33  
34  
35  
36  
37  
38  
39  
40  
41  
42  
43  
44  
45  
46  
47  
48  
49

## Introduction

Health equity is the principle of and commitment to incorporating social justice into health by reducing health inequalities. It implies that all people can reach their full health potential and should not be disadvantaged from attaining it because of their race, ethnicity, religion, gender, age, social class, socioeconomic status or other socially determined circumstances.[1] Health inequities occur in the absence of health equity.

Measuring health inequity is a difficult task, and requires two steps. First health inequalities are measured, which are differences in health outcomes between different groups in the same population. Second, health inequalities become health inequities when these differences are deemed unnecessary, avoidable, unjust and unfair.[1]

The health sector plays an important role in perpetuating or reducing health inequities.[3,4] The *Health Disparities Task Group of the Federal Provincial Territorial Advisory Committee on Population Health and Health Security* suggests that the health sector can reduce or increase health inequities depending on how their programs and policies are implemented and taken up by the population.[5] Focused health sector efforts to improve health care equity have the potential to reduce inequities in health

1  
2  
3  
4  
5 outcomes.[5-7] Health care equity means that health care services should be available,  
6  
7 accessible, and acceptable to everyone in the population, while also maintaining a high  
8  
9 degree of quality.[8]  
10

11  
12 Today, provincial governments and regional health authorities may not have the required  
13  
14 data (available via primary data collection or through administrative datasets) to assess  
15  
16 health inequalities, let alone determine whether inequity exists.[9,10] Limited  
17  
18 evaluations of health inequalities may also be due to limitations in health regions'  
19  
20 organizational capacity or lack of practical methods for health regions to use for  
21  
22 planning.[11] In Saskatchewan, the Ministry of Health's Strategic and Operational  
23  
24 Directions 2013-2014 identifies collaborating with communities, other Ministries and  
25  
26 different levels of government to close the gap in health inequalities and promote health  
27  
28 equity.[12] However, the Ministry does not identify specific measures or targets for  
29  
30 evaluating health inequalities. Potential measures and targets could be identified using  
31  
32 health administrative data.  
33  
34  
35  
36

37  
38 Practically, health outcomes are compared between SES groups in the population, which  
39  
40 presents both challenges and opportunities when using health administrative data to  
41  
42  
43  
44  
45

1  
2  
3  
4  
5 examine socio-economic status (SES) variation in health.[13] Administrative data often  
6 does not contain individual-level SES variables.[9] Despite evidence of individual- and  
7 area-level SES being associated with differential health outcomes in the population[14-  
8 16], health officials often lack data about their local context,[17] leading to potential  
9 underestimations of the extent of the inequities and limited ability to undertake  
10 evidence-based policy making to reduce inequities.[18]  
11  
12  
13  
14  
15  
16  
17  
18

19 As part of an ongoing commitment to address health inequities, Saskatoon Health Region has  
20 previously compared rate ratios between the highest and lowest income neighbourhoods  
21 within the city of Saskatoon.[17,19] This paper presents the Health Region's analytic  
22 approach to addressing health equity, building on the Region's past work and research  
23 conducted in Manitoba.[20], 21] This approach includes three major components: data,  
24 analysis, and prioritization.  
25  
26  
27  
28  
29  
30  
31  
32

### 33 **Data: Data sources, health outcomes, and adapting disparity measures to the local context**

34 The health inequities analytic approach begins by selecting relevant health outcomes.  
35 Outcomes are defined by either ICD codes or specific definitions used within the region.  
36 Appendix 1 shows the complete outcomes list, and definition and data source for each  
37  
38  
39  
40  
41  
42  
43  
44  
45

1  
2  
3  
4  
5 outcome.  
6  
7

8  
9 In Saskatchewan, the majority of health outcomes data are available in the hospital and  
10 medical services databases of the Government of Saskatchewan. The hospital service  
11 database includes all acute care in-patient separations, day surgeries, and in-patient  
12 psychiatric separations on patients treated in hospitals. The medical service database  
13 includes physicians' fee-for-service claims. Physicians under non fee-for-service  
14 arrangements submit shadow billings. Data for communicable diseases was available from the  
15 Saskatchewan Ministry of Health Integrated Public Health System. Childhood immunization  
16 data was available from the Saskatchewan Immunization Management System. Vital statistics  
17 data from the Ministry of Health was available for all cause mortality, infant mortality,  
18 low and high birth weight, teen pregnancy, and teen abortion.  
19  
20  
21  
22  
23  
24  
25  
26  
27  
28  
29  
30

31 For each data source, the most responsible diagnosis was used to calculate the numerator  
32 for each health outcome. Patients with multiple separations within one day were counted  
33 only once. Transfers of the same patient between hospitals were removed to avoid double  
34 counting.  
35  
36  
37  
38  
39  
40  
41  
42  
43  
44  
45

1  
2  
3  
4  
5 The Saskatchewan Population Registry, which includes all residents eligible for  
6 Saskatchewan Health benefits, on June 30<sup>th</sup> of the study year, was used as the denominator.  
7  
8

9  
10 Because individual-level SES data is not available, the unit of analysis is the  
11 dissemination area (DA). DAs have populations ranging between 400 to 700 people. DA as the  
12 unit of analysis was chosen because it is the smallest area of Canadian census geography,  
13 we can calculate rates within each DA using reliable population denominator data for each  
14 health outcome, and measures of deprivation are available for each DA. As well, DA and  
15 deprivation data are publicly available, which facilitates replication.  
16  
17  
18  
19  
20  
21  
22  
23  
24

25 Deprivation scores for each dissemination area (DA) in Saskatoon were obtained from the  
26 *Institut National de Santé Publique du Quebec* (INSPQ) using the deprivation index  
27 developed by Pampalon et al. and calculated for Saskatoon.[22,23] The deprivation index  
28 includes factors for material and social deprivation derived from the 2006 Canadian  
29 Census. The material deprivation factor includes the proportion of people age 15 years and  
30 older without a high school diploma, employment/population ratio of people aged 15 years  
31 and older, and the average income of people ages 15 years and older in the DA. The social  
32 deprivation factor includes the proportion of individuals aged 15 years and older living  
33  
34  
35  
36  
37  
38  
39  
40  
41  
42  
43  
44  
45  
46  
47  
48  
49



1  
2  
3  
4  
5 alone, the proportion of individuals aged 15 years and older who are separated, divorced  
6 or widowed, and the proportion of single-parent families. Quintiles of total deprivation  
7 are calculated by combining quintiles of material and social deprivation using the matrix  
8 developed by the Canadian Institute for Health Information (CIHI), see Appendix 2.  
9  
10  
11  
12

### 13 14 15 **Analysis: Measures and methods** 16

17  
18  
19 The methods used to examine inequality are the disparity rate ratio (DRR), disparity rate  
20 difference (DRD), and area-level concentration coefficient (ALCC). The (DRR) compares the  
21 relative socioeconomic variation on an outcome, by dividing the rate of the highest by the  
22 rate of the lowest area deprivation group at a given time period.(24-27]  
23  
24  
25  
26  
27  
28  
29

30 The disparity rate difference (DRD) compares the absolute socioeconomic variation in a  
31 health outcome, by subtracting the rate of the lowest area deprivation group from the rate  
32 of the highest area deprivation group.(24-27]  
33  
34  
35  
36  
37  
38  
39  
40  
41  
42  
43  
44  
45

1  
2  
3  
4  
5 While the DRR and DRD are good measures of difference between the two extreme quintiles  
6 (i.e. Q1 vs. Q5), they are unable to examine difference across the quintiles (i.e. Q1  
7 through Q5). To examine distribution across the quintiles, an area-level concentration  
8 curve (ALCC), was used.[28] Detailed methodological descriptions for calculating ALCC  
9 curves and ALCC coefficients have been published and are available in many statistical  
10 packages.[26] Appendix 3 shows the equations used for the calculation of the cumulative  
11 proportion of population by deprivation quintile, the cumulative proportion of each  
12 outcome by deprivation quintile, and the ALCC coefficient. ALCC coefficient values can  
13 range from zero to one. The Manitoba Centre for Health Policy suggests that ALCC  
14 coefficients represent low (ALCC < 0.06), medium (ALCC 0.06–0.20), and high (ALCC > 0.20)  
15 degrees of health inequality.[20,29,30] Figure 1 shows three possible scenarios for the  
16 ALCC coefficient (coefficient=0.05, 0.13 and 0.25).  
17  
18  
19  
20  
21  
22  
23  
24  
25  
26  
27  
28  
29  
30

31 To examine health inequalities over time, we compare yearly changes in DRR, DRD, and ALCC  
32 coefficient. We used the most recent available data for the analysis. Hospital services  
33 data was available from 1995 to 2011, physician billing data was available from 1996 to  
34 2009, communicable disease data was available from 2004 to 2010, childhood immunization  
35  
36  
37  
38  
39  
40  
41  
42  
43  
44  
45

1  
2  
3  
4  
5 data was available from 2002 to 2011, and vital statistics data was available from 1995 to  
6  
7 2009.

## 10 **Results**

11 Table 2 shows the rate of each outcome per 1000 population in Saskatoon in the given time  
12  
13 period, the DRR, the DRD and the ALCC coefficient.  
14  
15

16  
17  
18 Hospital services, 1995 to 2011, COPD and intentional self-harm are the most unequal  
19  
20 conditions based on the ALCC coefficient, this, despite a significant decrease in the ALCC  
21  
22 coefficient for these outcomes between 1995 and 2011.  
23  
24

25  
26  
27 Physician billing, 1996 to 2009, all outcomes are high inequality. Diabetes (ALCC=0.39),  
28  
29 stroke (ALCC=0.38), mental disorders (ALCC=0.38), and heart disease (ALCC=0.37) where the  
30  
31 most unequal. Also of note, the overall rate of diabetes in the physician billing data has  
32  
33 increased from 5.21 per 1000 in 1995 to 11.20 in 2009.  
34  
35

36  
37  
38 Communicable diseases, 2004 to 2010, all outcomes are high inequality. Tuberculosis (TB)  
39  
40 had the highest inequality. Of note, there were no cases of TB in the least deprived  
41  
42  
43  
44  
45

1  
2  
3  
4  
5 quintile from 1995–1999, 2002–2003, and in 2008. The rates for childhood immunization in  
6  
7 2011 were 653.9 per 1000 in Q5 (most deprived) and 838.8 per 1000 in Q1 (least deprived),  
8  
9 with a rate ratio of  $653.9/838.8=0.76$ . The interpretation for immunization is somewhat  
10  
11 counter-intuitive because high immunization rates are positive.  
12  
13

14  
15 Vital statistics, 1995 to 2009, show high inequality for all cause mortality (ALCC=0.23)  
16  
17 and teen pregnancy (ALCC=0.25). Teen abortion is also highly unequal though in the  
18  
19 opposite direction, with the least deprived quintile having more abortions than the most  
20  
21 deprived quintiles.  
22  
23

#### 24 25 **Prioritization: From Data to Intervention Priorities** 26 27

28  
29 To make policy and planning recommendations for the Health Region, an Inequalities  
30  
31 Priority Matrix (IPM) was developed which combines the results from the DRR, DRD, ALCC  
32  
33 coefficient, changes in DRR and DRD, and rate for each outcome. The IPM is not a formal  
34  
35 statistical test, but rather acts as a guide for identifying priorities based on changes  
36  
37 over time and absolute inequality. The IPM uses measures of inequality and provides a  
38  
39 method for assigning value judgments about the equitable distribution of health outcomes  
40  
41  
42  
43  
44  
45

1  
2  
3  
4  
5 by deprivation quintiles.  
6  
7

8  
9 The IPM is a seven step process, and Table 3 shows the complete IPM method for each  
10 outcome. Each step relies on determining the descending rank order of one of the  
11 inequality measures. Therefore the outcomes with the highest degree of inequality have  
12 the lowest rank score. The seven outcomes were the most recent ALCC coefficients, most  
13 recent DRR, most recent DRD, percent change in DRR between the oldest to most recent year,  
14 percent change in DRD between the oldest to most recent year, and overall rate. Scores  
15 for each ranking are then summed and sorted in ascending order. Thus, the lower the final  
16 score based on the 6 rankings the higher the level of priority for the given outcome.  
17  
18  
19  
20  
21  
22  
23  
24  
25  
26

27 The IPM analysis was conducted separately for each data source. This reflects the fact  
28 that physicians, hospitals and provincial health departments have different priorities  
29 both in terms of addressing the most inequitable outcomes and potential intervention  
30 levers. Also, the data sources have different limitations, which make comparisons across  
31 data sources inappropriate.  
32  
33  
34  
35  
36  
37  
38

39 Table 3 shows the results of the IPM. The first and second priorities to address related  
40  
41  
42  
43  
44  
45

1  
2  
3  
4  
5 to inequalities for hospitals are injuries and COPD. The physician billing data shows that  
6  
7 inequalities in mental illness and diabetes are high priority areas. In the vital  
8  
9 statistics data, the IPM suggests that inequalities in teen pregnancy and all cause  
10  
11 mortality should be addressed. For communicable diseases, Hepatitis C is the highest  
12  
13 priority for social inequalities. However, it should be noted that Tuberculosis is also a  
14  
15 high priority because it has a low incidence and a high degree of inequality. In fact,  
16  
17 there were no cases of TB in the least deprived quintile in many years, making it  
18  
19 impossible to calculate DRR and DRD.  
20

## 21 22 23 **Discussion**

24  
25  
26  
27 This paper presented Saskatoon Health Region's health inequities analytic approach. The  
28  
29 approach identifies health outcomes with high inequalities between population groups that  
30  
31 warrant further investigation and should be prioritized for intervention to improve health  
32  
33 equity at the health region level. The analytic approach addresses some of the pervasive  
34  
35 challenges of health inequities research and practice at the local level. We believe the  
36  
37 organizational requirements for applying the approach are reasonable and provide relevant  
38  
39 information for policy and service delivery planning. As well, all data is available to  
40  
41  
42  
43  
44  
45

1  
2  
3  
4  
5 local health authorities across Canada making the analysis replicable.  
6  
7

8  
9 This paper builds on past research by developing the Inequities Priority Matrix, an  
10 empirical method to prioritize further investigation and action. The IPM considers the  
11 overall rate of the disease in a given year but prioritizes measures of inequality, and  
12 changes in inequality over time. The primary strength of the IPM is that it can be used to  
13 assign value judgments about the equitable distribution of health outcomes by deprivation  
14 quintiles. This is an approach to empirically addressing health inequities in a local  
15 setting.  
16  
17  
18  
19  
20  
21  
22  
23  
24

25 The IPM has implications for using population or targeted prevention.[33-35] Highly  
26 unequal conditions with increasing differences between the most and least deprived  
27 quintiles are prioritized. These conditions should be addressed using structural or  
28 population interventions that are feasible given the scope of the organization. It is  
29 unrealistic for most physicians to attempt to address structural inequalities of income  
30 distribution in the population on their own. It is however feasible for physicians to  
31 provide additional care for populations with higher rates of mental disorders or diabetes,  
32  
33  
34  
35  
36  
37  
38  
39  
40  
41  
42  
43  
44  
45  
46  
47  
48  
49

1  
2  
3  
4 while providing culturally competent interventions that improve the acceptability of their  
5 health care.  
6  
7

8  
9  
10 Inequities in all-cause mortality prioritized using vital statistics data could be  
11 addressed by broader structural changes through intersectoral partnerships. For example,  
12 health regions in Saskatchewan are partners in Regional Intersectoral Committees, which  
13 bring together actors from health, education, social services, and justice to develop  
14 shared priorities, evaluation plans and outcomes for action. Intersectoral action has the  
15 potential to make structural changes to social policy that may reduce social inequalities  
16 in general.[36,37]  
17  
18  
19  
20  
21  
22  
23  
24  
25  
26

27 Despite the focus on highly unequal conditions with a high prevalence in the population,  
28 users of the analytic approach should pay special attention to those conditions with a low  
29 prevalence and a high degree of inequality. These low prevalent, high inequality outcomes  
30 may not respond well to population-level interventions and will likely require  
31 interventions based on the notion of vulnerable populations.[38,39] In Saskatoon,  
32 Hepatitis C and Tuberculosis are of particular concern because they have the highest  
33 degree of inequality and lowest prevalence.  
34  
35  
36  
37  
38  
39  
40  
41  
42  
43  
44  
45  
46  
47  
48  
49



1  
2  
3  
4  
5  
6  
7 The strengths of the analytic approach are the use of data available to local health  
8 regions in Canada. The approach balances the need for replicable and commonly used  
9 statistical techniques with available expertise of health region staff. However, despite  
10 debate in the literature [31,32], we felt that limiting our methods to three complimentary  
11 but distinct measures, the DRR, DRD, and the ALCC coefficient, would capture inequalities  
12 and be replicable.  
13  
14  
15  
16  
17  
18  
19

## 20 21 **Limitations**

22  
23  
24  
25 The analytic approach has several limitations. Data quality is an issue, particularly with  
26 respect to physician billing. In Saskatchewan, approximately 33% of general practitioners,  
27 and 38% of specialists shadow bill. Physicians typically don't shadow bill 100% of their  
28 work and there is no audit done in Saskatchewan on the accuracy of shadow billing. Health  
29 seeking behavior differs between SES groups, which could lead to bias in the disparity  
30 calculations. As well, billing does not represent disease, so physicians may  
31 systematically report a certain disease when presented with multiple patient complaints  
32 leading to differential rates by SES.  
33  
34  
35  
36  
37  
38  
39  
40  
41  
42  
43  
44  
45

1  
2  
3  
4  
5  
6  
7 In addition, the injury and self-harm data is conflated with the self-harm data. Injury  
8 data contains all self-harm attempts.  
9

10  
11  
12 The IPM is an attempt to prioritize inequalities based on available data. We did not  
13 consider change in ALCC coefficient. Multiple iterations of the IPM were developed over  
14 the course of this project. We believe the IPM provides sufficient nuance to prioritize  
15 conditions, while being replicable.  
16  
17  
18  
19  
20  
21  
22

23 The analysis is subject to the ecological fallacy.[40] Ideally, health administrative  
24 datasets would include information regarding individual's socioeconomic status. As well,  
25 the outcomes in this study extend from 1995 to 2011. We used deprivation data from the  
26 2006 census. Our method assumes no change in area-level deprivation between 1995 and 2011  
27 in Saskatoon, leading to potential misclassification bias. Comparisons of area-level  
28 deprivation between 2001 and 2006 show that 45% of DAs did not change deprivation  
29 quintiles and 37% of changes were within 1 deprivation quintile.  
30  
31  
32  
33  
34  
35  
36  
37  
38  
39  
40  
41  
42  
43  
44  
45  
46  
47  
48  
49

1  
2  
3  
4  
5 Inequalities in health service utilization data do not always correspond to inequity in  
6 quality of care or prevalence of disease. Future studies should attempt to better quantify  
7 inequity by analyzing the “service-to-need ratio” taking into account both service  
8 utilization and service need, rather than only service utilization.  
9  
10  
11  
12  
13

### 14 **Conclusion**

15  
16  
17  
18  
19 The Saskatoon Health Region’s health inequities analytic approach uses an empirical  
20 method, and available data to describe, and prioritize action to address health inequities  
21 at the local level. The health inequities analytic approach is replicable as it uses  
22 available data and common methods.  
23  
24  
25  
26  
27  
28  
29  
30  
31  
32  
33  
34  
35  
36  
37  
38  
39  
40  
41  
42  
43  
44  
45  
46  
47  
48  
49

## References

1. Whitehead M, Dahlgren G. Concepts and principles in tackling social inequities in health: Levelling up Part 1. World Health Organization; 2006.
2. Braveman P. What Are Health Disparities and Health Equity? We Need to Be Clear. Public Health Reports. 2014;129(Supplement 2):5-8.
3. Starfield B, Shi L, Macinko J. Contribution of Primary Care to Health Systems and Health. Milbank Quarterly. 2005 Sep;83(3):457-502.
4. Macinko J, Starfield B, Shi L. The Contribution of Primary Care Systems to Health Outcomes within Organization for Economic Cooperation and Development (OECD) Countries, 1970-1998. Health Serv Res. 2003 Jun;38(3):831-65.
5. Health Disparities Task Group of the Federal Provincial Territorial Advisory Committee on Population. Reducing Health Disparities - Roles of the Health Sector: Discussion Paper. Public Health Agency of Canada; 2005 Nov pp. 1-43.
6. Mackenbach JP. A strategy for tackling health inequalities in the Netherlands. BMJ. 2002 Nov 2;325(7371):1029-32.

- 1  
2  
3  
4  
5 7. Mackenbach JP. Can we reduce health inequalities? An analysis of the English strategy  
6 (1997–2010). *Journal of Epidemiology & Community Health*. 2011 Apr 1;65:568–75.  
7  
8
- 9  
10 8. World Health Organization. *The Right to Health*. World Health Organization; 2007.  
11
- 12  
13 9. Krieger N, Fee E. Social Class: The Missing Link in U.S. Health Data. *International*  
14  
15 *Journal of Health Services*. 1995 Jan 1;24(1):25–44.  
16
- 17  
18 10. Krieger N, Williams DR, Moss NE. Measuring Social Class in US Public Health Research:  
19  
20 *Concepts, Methodologies, and Guidelines*. *Annual Review of Public Health*. Annual  
21  
22 *Reviews* 4139 El Camino Way, P.O. Box 10139, Palo Alto, CA 94303–0139, USA; 1997  
23  
24 May;18(1):341–78.  
25
- 26  
27 11. Bell B. *Actions to Reduce Health Inequalities in Canada: A description of strategic*  
28  
29 *efforts led or supported by public health organizations [Internet]*. Public Health  
30  
31 *Agency of Canada*. Public Health Agency of Canada Strategic Initiatives and  
32  
33 *Innovations Directorate*; 2009 [cited 2014 Feb 14]. Available from:  
34  
35 [https://opha.on.ca/getmedia/1d0a2b1c-e9f6-4a23-9344-](https://opha.on.ca/getmedia/1d0a2b1c-e9f6-4a23-9344-c34c1beeff99/StrategicInitiatives-PHAC-6Mar09.pdf.aspx?ext=.pdf)  
36  
37 [c34c1beeff99/StrategicInitiatives-PHAC-6Mar09.pdf.aspx?ext=.pdf](https://opha.on.ca/getmedia/1d0a2b1c-e9f6-4a23-9344-c34c1beeff99/StrategicInitiatives-PHAC-6Mar09.pdf.aspx?ext=.pdf)  
38
- 39  
40 12. Ministry of Health. *Plan for 2013–2014*. Gouvernement of Saskatchewan. Government of  
41  
42  
43  
44  
45  
46  
47  
48  
49

- 1  
2  
3  
4  
5 Saskatchewan; 2013 Apr pp. 1-26.  
6  
7  
8 13. Gavriellov-Yusim N, Friger M. Use of administrative medical databases in population-  
9 based research. *Journal of Epidemiology & Community Health*. 2014 Jan 29;68(3):283-7.  
10  
11  
12  
13 14. Steenland K, Henley J, Calle E, Thun M. Individual- and Area-Level Socioeconomic  
14 Status Variables as Predictors of Mortality in a Cohort of 179,383 Persons. *American*  
15 *Journal of Epidemiology*. 2004 Jun 1;159(11):1047-56.  
16  
17  
18  
19  
20 21. Meijer M, Röhl J, Bloomfield K, Grittner U. Do neighborhoods affect individual  
21 mortality? A systematic review and meta-analysis of multilevel studies. *Social*  
22 *Science & Medicine*. 2013;74(8):1204-12.  
23  
24  
25  
26  
27 27. Ngo AD, Paquet C, Howard NJ, Coffee NT, Adams R, Taylor A, et al. Area-level  
28 socioeconomic characteristics and incidence of metabolic syndrome: a prospective  
29 cohort study. *BMC Public Health*. 2013;13(1):681.  
30  
31  
32  
33  
34 34. Lemstra M, Neudorf C, Opondo J. Health Disparity by Neighbourhood Income. *Canadian*  
35 *Journal of Public Health*. 2006 Nov 7;97(6):435-9.  
36  
37  
38  
39 39. Orton L, Lloyd-Williams F, Taylor-Robinson D, Moonan M, O'Flaherty M, Capewell S. O5-  
40  
41  
42  
43  
44  
45  
46  
47  
48  
49

1  
2  
3  
4  
5 5.2 Evidence-based public health policy: myth or reality? A mixed method study of  
6 public health decision-making in the UK. *Journal of Epidemiology & Community Health*.  
7 2011 Aug 5;65(Suppl 1):A55-5.  
8

- 9  
10  
11 19. Lemstra M, Neudorf C, Beaudin G. Health Disparity Knowledge and Support for  
12 Intervention in Saskatoon. *Canadian Journal of Public Health*. 2007;98(6):484-8.  
13  
14  
15 20. Martens P, Brownell M, Au W, MacWilliam L, Prior H, Schultz J, et al. Health  
16 inequities in Manitoba: Is the Socioeconomic Gap in Health Widening or Narrowing over  
17 Time? Winnipeg, MB: Manitoba Centre for Health Policy; 2010 Sep pp. 1-270.  
18  
19  
20  
21 21. Neudorf C, Kryzanowski J, Turner H, Cushon J, Fuller D, Ugolini C, et al. Advancing  
22 Health Equity in Health Care [Internet]. Saskatoon; 2014 [cited 2014 Jun 27]. pp. 1-  
23 26. Available from:  
24 [http://www.communityview.ca/pdfs/2014\\_shr\\_phase3\\_advancing\\_healthequity\\_healthcare\\_se-](http://www.communityview.ca/pdfs/2014_shr_phase3_advancing_healthequity_healthcare_series.pdf)  
25 [ries.pdf](http://www.communityview.ca/pdfs/2014_shr_phase3_advancing_healthequity_healthcare_series.pdf)  
26  
27  
28  
29  
30  
31  
32  
33  
34  
35 22. Pampalon R, Hamel D, Gamache P. A comparison of individual and area-based socio-  
36 economic data for monitoring social inequalities in health. *Health Reports*.  
37 2009;20(3):84-94.  
38  
39  
40  
41  
42  
43  
44  
45  
46  
47  
48  
49

- 1  
2  
3  
4  
5 23. Pampalon R, Hamel D, Gamache P, Raymond G. A deprivation index for health planning in  
6 Canada. *Chronic Diseases in Canada*. 2009;29(4):178-91.  
7  
8  
9  
10 24. Regidor E. Measures of health inequalities: part 1. *Journal of Epidemiology &*  
11 *Community Health*. 2004 Oct 1;58(10):858-61.  
12  
13  
14  
15 25. Regidor E. Measures of health inequalities: part 2. *Journal of Epidemiology &*  
16 *Community Health*. 2004 Nov 1;58(11):900-3.  
17  
18  
19  
20 26. O'Donnell O, van Doorslaer E, Wagstaff A, Lindelow M. Analyzing Health Equity Using  
21 Household Survey Data: *A Guide to Techniques and Their Implementation*. The World  
22 Bank; 2008 pp. 1-234.  
23  
24  
25  
26  
27 27. Wagstaff A, Paci P, van Doorslaer E. On the Measurement of Inequalities in Health.  
28 *Social Science & Medicine*. 1991;33(5):545-57.  
29  
30  
31  
32 28. Lorenz MO. Methods of Measuring the Concentration of Wealth [Internet]. *American*  
33 *Statistical Association*. [cited 1905]. pp. 209-19. Available from:  
34 <http://www.jstor.org/stable/2276207>  
35  
36  
37  
38  
39 29. Roos NP, Mustard CA. Variation in Health and Health Care Use by Socioeconomic Status  
40  
41  
42  
43  
44  
45  
46  
47  
48  
49



1  
2  
3  
4  
5 in Winnipeg, Canada: Does the System Work Well? Yes and No. *Milbank Quarterly*. 1997  
6  
7 Mar;75(1):89-111.  
8

- 9  
10 30. Mustard CA, Derksen S, Berthelot J-M, Wolfson M. Assessing ecologic proxies for  
11 household income: a comparison of household and neighbourhood level income measures  
12 in the study of population health status. *Health & Place*. 1999 Jun;5(2):157-71.  
13  
14  
15 31. Manor O, Matthews S, Power C. Comparing measures of health inequality. *Social Science*  
16 & *Medicine*. 1997 Sep;45(5):761-71.  
17  
18  
19 32. Kawachi I, Kennedy BP. The relationship of income inequality to mortality: Does the  
20 choice of indicator matter? *Social Science & Medicine*. 1997 Oct;45(7):1121-7.  
21  
22  
23 33. Rose G. Sick Individuals and Sick Populations. *International Journal of Epidemiology*.  
24 2001 Jun 11;40:427-32.  
25  
26  
27 34. Frohlich KL, Mykhaloskiy E, Miller F, Daniel M. Advancing the population health  
28 agenda. *Canadian Journal of Public Health*. 2004 Oct 7;95(5):392-5.  
29  
30  
31 35. McLaren L, McIntyre L, Kirkpatrick S. Rose's population strategy of prevention need  
32 not increase social inequalities in health. *International Journal of Epidemiology*.  
33  
34  
35  
36  
37  
38  
39  
40  
41  
42  
43  
44  
45

- 1  
2  
3  
4  
5 2010;39(2):372-7.  
6  
7  
8 36. McCall L, Percheski C. Income Inequality: New Trends and Research Directions. *Annu*  
9 *Rev Sociol.* 2010 Jun;36(1):329-47.  
10  
11  
12  
13 37. Fortin N, Green DA, Lemieux T, Milligan K, Riddell WC. Canadian Inequality: Recent  
14 Developments and Policy Options. *Canadian Public Policy.* 2012;38(2):121-45.  
15  
16  
17  
18 38. Semenza JC, Giesecke J. Intervening to Reduce Inequalities in Infections in Europe.  
19 *American Journal of Public Health.* American Public Health Association; 2008  
20 May;98(5):787-92.  
21  
22  
23  
24  
25 39. Semenza JC, Suk J, Manisero D. Intervening on High-Risk or Vulnerable Populations?  
26 *American Journal of Public Health.* 2008 Aug;98(8):1351-2.  
27  
28  
29  
30 40. Oakes JM. Commentary: Individual, ecological and multilevel fallacies. *International*  
31 *Journal of Epidemiology.* 2009 Apr;38(2):361-8-authorreply370-3.  
32  
33  
34  
35  
36  
37  
38  
39  
40  
41  
42  
43  
44  
45  
46  
47  
48  
49

Figure 1. Three possible scenarios for the area level concentration curve (ALCC) coefficient (coefficient =0.05, 0.13 and 0.25) and (ALCC) curve based on the recommendations of the Manitoba Centre for Health Policy.

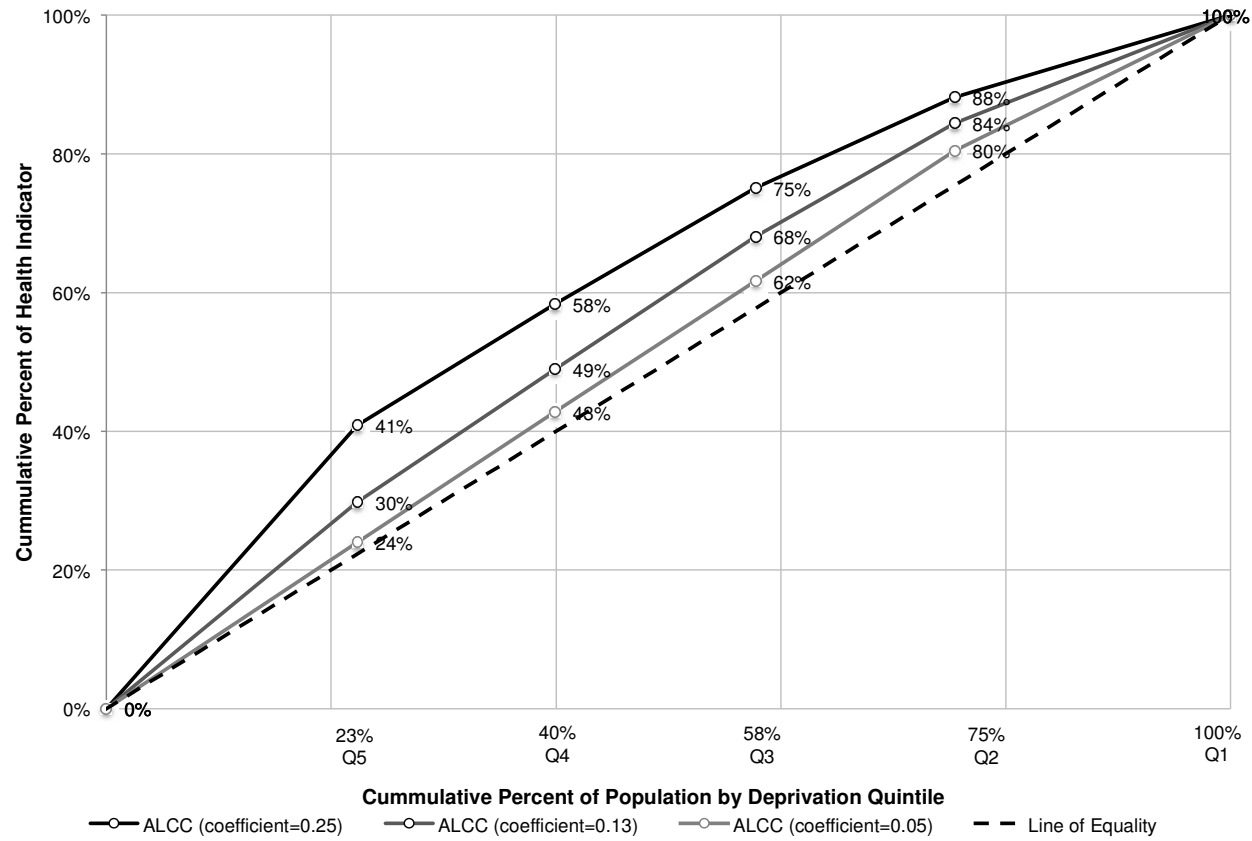

1  
2  
3  
4  
5  
6  
7  
8  
9  
10  
11  
12  
13  
14  
15  
16  
17  
18  
19  
20  
21  
22  
23  
24  
25  
26  
27  
28  
29  
30  
31  
32  
33  
34  
35  
36  
37  
38  
39  
40  
41  
42  
43  
44  
45  
46  
47  
48  
49

Table 2. Overall rates, rate ratios, rate differences, % change in rate ratio, % change in rate difference and area level concentration curve (ALCC) coefficients for each health outcome used in the Saskatoon health inequities analytic approach.

|                             | Rate per 1000 | Rate per 1000 | % Change in Rate | Disparity Rate Ratio | Disparity Rate Ratio | DRR % change | Disparity rate difference | Disparity rate difference | DRD % change | ALCC Coefficient | ALCC Coefficient | % Change in ALCC |
|-----------------------------|---------------|---------------|------------------|----------------------|----------------------|--------------|---------------------------|---------------------------|--------------|------------------|------------------|------------------|
| <b>Hospitalization Data</b> |               |               |                  |                      |                      |              |                           |                           |              |                  |                  |                  |
|                             | 1995          | 2011          | 1995 to 2011     | 1995                 | 2011                 | 1995 to 2011 | 1995                      | 2011                      | 1995 to 2011 | 1995             | 2011             | 1995 to 2011     |
| Cancer                      | 8.03          | 4.66          | ↓ 42% *          | 1.13                 | 1.18                 | ↓ 4%         | 0.92                      | 0.84                      | ↓ 9%         | 0.13             | 0.04             | ↓ 68% *          |
| Self-Harm                   | 0.84          | 0.39          | ↓ 54% *          | 5.58                 | 3.58                 | ↓ 36%        | 1.28                      | 0.48                      | ↓ 63%        | 0.28             | 0.23             | ↓ 17% *          |
| COPD                        | 2.82          | 1.71          | ↓ 39% *          | 2.59                 | 3.42                 | ↑ 32% *      | 2.61                      | 2.19                      | ↓ 16%        | 0.33             | 0.28             | ↓ 15% *          |
| Mental Disorders            | 6.17          | 3.48          | ↓ 44% *          | 2.9                  | 2.44                 | ↓ 16%        | 6.35                      | 3.28                      | ↓ 48%        | 0.20             | 0.18             | ↓ 10%            |
| Heart Disease               | 5.56          | 2.37          | ↓ 57% *          | 1.41                 | 1.75                 | ↑ 24% *      | 1.64                      | 1.43                      | ↓ 13%        | 0.15             | 0.16             | ↑ 10%            |
| Diabetes                    | 1.13          | 1.16          | ↑ 3%             | 1.74                 | 2.75                 | ↑ 58% *      | 0.6                       | 1.31                      | ↑ 116%       | 0.18             | 0.19             | ↑ 8%             |
| Injury                      | 6.91          | 5.79          | ↓ 16%            | 1.82                 | 2.35                 | ↑ 29% *      | 4.35                      | 5.11                      | ↑ 18%        | 0.17             | 0.2              | ↑ 14%            |
| Stroke                      | 2.41          | 1.19          | ↓ 51% *          | 1.67                 | 2.03                 | ↑ 21% *      | 1.24                      | 0.76                      | ↓ 39%        | 0.23             | 0.16             | ↓ 28% *          |
| <b>Physician Billing</b>    |               |               |                  |                      |                      |              |                           |                           |              |                  |                  |                  |
|                             | 1996          | 2009          | 1996 to 2009     | 1996                 | 2009                 | 1996 to 2009 | 1996                      | 2009                      | 1996 to 2009 | 1996             | 2009             | 1996 to 2009     |
| Stroke                      | 1.81          | 1.19          | ↓ 34% *          | 4.85                 | 6.16                 | ↑ 27%        | 2.6                       | 2.26                      | ↓ 13%        | 0.42             | 0.38             | ↓ 9%             |
| Diabetes                    | 5.21          | 11.2          | ↑ 115% *         | 8.28                 | 9.91                 | ↑ 20%        | 8.58                      | 22.73                     | ↑ 165%       | 0.40             | 0.39             | ↓ 4%             |
| Heart Disease               | 5.32          | 5.96          | ↑ 12%            | 5.02                 | 7.29                 | ↑ 45% *      | 6.93                      | 11.2                      | ↑ 62%        | 0.36             | 0.37             | ↑ 1%             |
| Mental Disorders            | 31.87         | 41.95         | ↑ 32% *          | 6.81                 | 9.05                 | ↑ 33% *      | 51.86                     | 81.44                     | ↑ 57%        | 0.35             | 0.38             | ↑ 10%            |

|                     |        |        |              |      |       |              |         |         |              |      |      |              |
|---------------------|--------|--------|--------------|------|-------|--------------|---------|---------|--------------|------|------|--------------|
| Injury              | 62.41  | 44.52  | ↓ 29% *      | 5.23 | 7.41  | ↑ 42% *      | 85.49   | 71.43   | ↓ 17%        | 0.30 | 0.33 | ↑ 12%        |
| Cancer              | 5.66   | 7.54   | ↑ 33%        | 3.91 | 5.56  | ↑ 42%        | 6.13    | 11.09   | ↑ 81%        | 0.25 | 0.28 | ↑ 13%        |
| COPD                | 26.65  | 20.91  | ↓ 22%        | 6.23 | 9.26  | ↑ 49% *      | 40.38   | 38.05   | ↑ 6%         | 0.32 | 0.37 | ↑ 13%        |
| STI Infections Data |        |        |              |      |       |              |         |         |              |      |      |              |
|                     | 2004   | 2010   | 2004 to 2010 | 2004 | 2010  | 2004 to 2010 | 2004    | 2010    | 2004 to 2010 | 2004 | 2010 | 2004 to 2010 |
| Chlamydia           | 3.31   | 4.85   | ↑ 47%        | 4.22 | 2.96  | ↓ 30% *      | 4.94    | 5.24    | ↑ 6%         | 0.29 | 0.25 | ↓ 16%        |
| Tuberculosis        | 0.013  | 0.064  | ↑ 392%       | N/A  | N/A   | N/A          | N/A     | N/A     | N/A          | 0.58 | 0.56 | ↓ 4%         |
| Gonorrhea           | 0.46   | 0.40   | ↓ 13%        | 8.4  | 4.79  | ↓ 43%        | 0.93    | 0.73    | ↓ 21%        | 0.40 | 0.47 | ↑ 19%        |
| HEP C               | 0.81   | 0.37   | ↓ 54% *      | 7.84 | 11.14 | ↑ 42%        | 1.94    | 1.54    | ↓ 21%        | 0.43 | 0.51 | ↑ 20% *      |
| Vital Statistics    |        |        |              |      |       |              |         |         |              |      |      |              |
|                     | 1995   | 2009   | 1995 to 2009 | 1995 | 2009  | 1995 to 2009 | 1995    | 2009    | 1995 to 2009 | 1995 | 2009 | 1995 to 2009 |
| High Birth Weight   | 106.37 | 134.82 | ↑ 27%        | 0.73 | 0.95  | ↑ 30% *      | -33.71  | -6.54   | ↓ 81%        | 0.15 | 0.08 | ↓ 46% *      |
| Teen Abortion       | 245.45 | 195.61 | ↓ 20%        | 0.63 | 0.93  | ↑ 49% *      | -119.36 | -13.19  | ↓ 89%        | 0.31 | 0.21 | ↓ 32% *      |
| All Cause Mortality | 6.09   | 5.88   | ↓ 3%         | 2.28 | 2.34  | ↑ 3% *       | 4.61    | 5.38    | ↑ 17%        | 0.28 | 0.23 | ↓ 17%        |
| Infant Mortality    | 10.73  | 8.36   | ↓ 22% *      | 2.87 | 1.61  | ↓ 44%        | 10.71   | 3.39    | ↓ 69%        | 0.18 | 0.17 | ↓ 5%         |
| Low Birth Weight    | 65.95  | 61.49  | ↓ 7%         | 2.27 | 1.53  | ↓ 33%        | 54.5    | 27.79   | ↓ 49%        | 0.06 | 0.06 | → 0%         |
| Teen Pregnancy      | 87.09  | 56.64  | ↓ 35% *      | 4.19 | 8.63  | ↑ 106% *     | 113.31  | 114.25  | ↑ 1%         | 0.17 | 0.25 | ↑ 50% *      |
| Immunizations Data  |        |        |              |      |       |              |         |         |              |      |      |              |
|                     | 2002   | 2011   | 2002 to 2011 | 2002 | 2011  | 2002 to 2011 | 2002    | 2011    | 2002 to 2011 | 2002 | 2011 | 2002 to 2011 |
| Child Immunization  | 624.90 | 745.87 | ↑ 19%        | 0.32 | 0.76  | ↑ 136% *     | -312.1  | -202.86 | ↓ 35%        | 0.09 | 0.07 | ↓ 22%        |

1  
2  
3  
4  
5  
6  
7  
8  
9  
10  
11  
12  
13  
14  
15  
16  
17  
18  
19  
20  
21  
22  
23  
24  
25  
26  
27  
28  
29  
30  
31  
32  
33  
34  
35  
36  
37  
38  
39  
40  
41  
42  
43  
44  
45  
46  
47  
48  
49

Note. Recalculations of the percent change in overall rate, rate ratios, rate difference, and ALCC coefficients are subject to rounding error. The actual calculation was done rounding to the nearest fifth decimal.

\* Represents a statistically significant ( $p < 0.05$ ) change.

+ N/A = There were no cases of Tuberculosis in the least deprived group.

Confidential

Table 3. Inequalities Priority Matrix (IPM) steps and final rankings for hospitalization, physician billing, communicable diseases, and vital statistics data.

|                             | <u>STEP 1:</u> Sort Descending & Rank by ALCC score | <u>STEP 2:</u> Sort Descending & Rank by absolute DRR for T5 <sup>^</sup> | <u>STEP 3:</u> Sort Descending & Rank by absolute DRD for T5 <sup>^</sup> | <u>STEP 4:</u> Sort Descending & Rank by % DRR Change for T1 to T5 <sup>^</sup> | <u>STEP 5:</u> Sort Descending & Rank by % DRD Change for T1 to T5 <sup>^</sup> | <u>STEP 6:</u> Sort Descending & Rank by absolute rate per 1000 at T5 <sup>^</sup> | <u>STEP 7:</u> Sum scores from step 1 to 6 & Sort Ascending |                  |               |                  |               |                     |             |               |
|-----------------------------|-----------------------------------------------------|---------------------------------------------------------------------------|---------------------------------------------------------------------------|---------------------------------------------------------------------------------|---------------------------------------------------------------------------------|------------------------------------------------------------------------------------|-------------------------------------------------------------|------------------|---------------|------------------|---------------|---------------------|-------------|---------------|
| Outcome                     | ALC C                                               | ALC C Score                                                               | DRR                                                                       | DRR Score                                                                       | DRD                                                                             | DRD Score                                                                          | Change in DRR                                               | DRR Change Score | Change in DRD | DRD Change Score | Rate per 1000 | Rate per 1000 Score | FINAL SCORE | PRIORITY RANK |
| <b>Hospitalization Data</b> |                                                     |                                                                           |                                                                           |                                                                                 |                                                                                 |                                                                                    |                                                             |                  |               |                  |               |                     |             |               |
| Injury                      | 0.20                                                | 3                                                                         | 2.35                                                                      | 5                                                                               | 5.11                                                                            | 1                                                                                  | 29                                                          | 3                | 18            | 2                | 5.79          | 1                   | 15          | 1             |
| COPD                        | 0.28                                                | 1                                                                         | 3.42                                                                      | 2                                                                               | 2.19                                                                            | 3                                                                                  | 32                                                          | 2                | -16           | 5                | 1.71          | 5                   | 18          | 2             |
| Diabetes                    | 0.19                                                | 4                                                                         | 2.75                                                                      | 3                                                                               | 1.31                                                                            | 5                                                                                  | 58                                                          | 1                | 116           | 1                | 1.16          | 7                   | 21          | 3             |
| Mental Disorders            | 0.18                                                | 5                                                                         | 2.44                                                                      | 4                                                                               | 3.28                                                                            | 2                                                                                  | -16                                                         | 7                | -48           | 7                | 3.48          | 3                   | 28          | 4             |
| Heart Disease               | 0.16                                                | 6                                                                         | 1.75                                                                      | 7                                                                               | 1.43                                                                            | 4                                                                                  | 24                                                          | 4                | -13           | 4                | 2.37          | 4                   | 29          | 5             |
| Cancer                      | 0.04                                                | 8                                                                         | 1.18                                                                      | 8                                                                               | 0.84                                                                            | 6                                                                                  | -4                                                          | 6                | -9            | 3                | 4.66          | 2                   | 33          | 6             |
| Self-Harm                   | 0.23                                                | 2                                                                         | 3.58                                                                      | 1                                                                               | 0.48                                                                            | 8                                                                                  | -36                                                         | 8                | -63           | 8                | 0.39          | 8                   | 35          | 7             |
| Stroke                      | 0.16                                                | 7                                                                         | 2.03                                                                      | 6                                                                               | 0.76                                                                            | 7                                                                                  | 21                                                          | 5                | -39           | 6                | 1.19          | 6                   | 37          | 8             |
| <b>Physician Billing</b>    |                                                     |                                                                           |                                                                           |                                                                                 |                                                                                 |                                                                                    |                                                             |                  |               |                  |               |                     |             |               |
| Mental Disorders            | 0.38                                                | 3                                                                         | 9.05                                                                      | 3                                                                               | 81.44                                                                           | 1                                                                                  | 33                                                          | 5                | 57            | 4                | 41.95         | 2                   | 18          | 1             |
| Diabetes                    | 0.39                                                | 1                                                                         | 9.91                                                                      | 1                                                                               | 22.73                                                                           | 4                                                                                  | 20                                                          | 7                | 165           | 1                | 11.20         | 4                   | 18          | 1             |
| COPD                        | 0.37                                                | 5                                                                         | 9.26                                                                      | 2                                                                               | 38.05                                                                           | 3                                                                                  | 49                                                          | 1                | 6             | 5                | 20.91         | 3                   | 19          | 3             |
| Injury                      | 0.33                                                | 6                                                                         | 7.41                                                                      | 4                                                                               | 71.43                                                                           | 2                                                                                  | 42                                                          | 3                | -17           | 7                | 44.52         | 1                   | 23          | 4             |
| Heart Disease               | 0.37                                                | 4                                                                         | 7.29                                                                      | 5                                                                               | 11.20                                                                           | 5                                                                                  | 45                                                          | 2                | 62            | 3                | 5.96          | 6                   | 25          | 5             |
| Cancer                      | 0.28                                                | 7                                                                         | 5.56                                                                      | 7                                                                               | 11.09                                                                           | 6                                                                                  | 42                                                          | 4                | 81            | 2                | 7.54          | 5                   | 31          | 6             |
| Stroke                      | 0.38                                                | 2                                                                         | 6.16                                                                      | 6                                                                               | 2.26                                                                            | 7                                                                                  | 27                                                          | 6                | -13           | 6                | 1.19          | 7                   | 34          | 7             |

1  
2  
3  
4  
5  
6  
7  
8  
9  
10  
11  
12  
13  
14  
15  
16  
17  
18  
19  
20  
21  
22  
23  
24  
25  
26  
27  
28  
29  
30  
31  
32  
33  
34  
35  
36  
37  
38  
39  
40  
41  
42  
43  
44  
45  
46  
47  
48  
49

| Communicable Diseases |             |          |            |   |            |   |            |   |            |   |             |          |          |          |
|-----------------------|-------------|----------|------------|---|------------|---|------------|---|------------|---|-------------|----------|----------|----------|
| <b>Tuberculosis</b>   | <b>0.56</b> | <b>1</b> | <b>N/A</b> |   | <b>N/A</b> |   | <b>N/A</b> |   | <b>N/A</b> |   | <b>0.06</b> | <b>4</b> | <b>5</b> | <b>1</b> |
| HEP C                 | 0.51        | 2        | 11.1<br>4  | 1 | 1.54       | 2 | 42         | 1 | -21        | 2 | 0.37        | 3        | 11       | 1        |
| Chlamydia             | 0.25        | 4        | 2.96       | 3 | 5.24       | 1 | -30        | 2 | 6          | 1 | 4.85        | 1        | 12       | 2        |
| Gonorrhea             | 0.47        | 3        | 4.79       | 2 | 0.73       | 3 | -43        | 3 | -21        | 3 | 0.40        | 2        | 16       | 3        |
| Vital Statistics      |             |          |            |   |            |   |            |   |            |   |             |          |          |          |
| Teen Pregnancy        | 0.25        | 1        | 8.63       | 1 | 114.2<br>5 | 1 | 106        | 1 | 1          | 2 | 56.64       | 4        | 10       | 1        |
| All Cause Mortality   | 0.23        | 2        | 2.34       | 2 | 5.38       | 3 | 3          | 4 | 17         | 1 | 5.88        | 6        | 18       | 2        |
| Low Birth Weight      | 0.06        | 6        | 1.53       | 4 | 27.79      | 2 | -33        | 5 | -49        | 3 | 61.49       | 3        | 23       | 3        |
| Teen Abortion         | 0.21        | 3        | 0.93       | 6 | -          | 6 | 49         | 2 | -89        | 6 | 195.6<br>1  | 1        | 24       | 4        |
| High Birth Weight     | 0.08        | 5        | 0.95       | 5 | -6.54      | 5 | 30         | 3 | -81        | 5 | 134.8<br>2  | 2        | 25       | 5        |
| Infant Mortality      | 0.17        | 4        | 1.61       | 3 | 3.39       | 4 | -44        | 6 | -69        | 4 | 8.36        | 5        | 26       | 6        |

Note. **Bold = Special focus (low prevalence, high inequality)**



1  
2  
3  
4  
5  
6  
7  
8  
9  
10  
11  
12  
13  
14  
15  
16  
17  
18  
19  
20  
21  
22  
23  
24  
25  
26  
27  
28  
29  
30  
31  
32  
33  
34  
35  
36  
37  
38  
39  
40  
41  
42  
43  
44  
45  
46  
47  
48  
49

Confidential

## Appendix 1 - complete indicator list, definition and data sources for each indicator

|                                                  | Data Source                                                | Definition                                                                                                                                                                                                                                                                                                                                                                                                                                                                                                                                           | Inclusion/Exclusion                                                                                                                                                                                                                                                                                                                                                                                    | Limitations                                                                                                                                                                                                                                                                                                                                                                                                                                               |
|--------------------------------------------------|------------------------------------------------------------|------------------------------------------------------------------------------------------------------------------------------------------------------------------------------------------------------------------------------------------------------------------------------------------------------------------------------------------------------------------------------------------------------------------------------------------------------------------------------------------------------------------------------------------------------|--------------------------------------------------------------------------------------------------------------------------------------------------------------------------------------------------------------------------------------------------------------------------------------------------------------------------------------------------------------------------------------------------------|-----------------------------------------------------------------------------------------------------------------------------------------------------------------------------------------------------------------------------------------------------------------------------------------------------------------------------------------------------------------------------------------------------------------------------------------------------------|
| <b>Mortality data</b>                            | Saskatchewan Ministry of Health's Vital Statistics Branch  | Deaths are those that occur to SHR residents using data from 1991-2006 from Saskatchewan Vital Statistics, Alberta Vital Statistics, and CIHI hospital separations for deaths occurring in all other provinces. ICD-9 codes are used for all deaths before calendar year 2000 and after this date ICD-10 codes are used                                                                                                                                                                                                                              | Includes those persons with Saskatchewan recorded as their province of residence.                                                                                                                                                                                                                                                                                                                      | Conversion between ICD-9 and ICD-10 codes can be problematic for certain disease conditions because the codes are not comparable. Vital Statistics data is based on the underlying cause of death, which is limited to one diagnosis, unless there is an injury, then there is a separate code for the external cause. Readers should note that there may be more than one contributing cause of death, but that only the most responsible cause is used. |
| <b>Birth data</b>                                | Saskatchewan Ministry of Health's Vital Statistics Branch  | births occurring to SHR residents from 1991 to 2006 using data from Saskatchewan Vital Statistics, Alberta Vital Statistics, and CIHI hospital separations for births occurring in all other provinces.                                                                                                                                                                                                                                                                                                                                              | Includes only those mothers who have put Saskatchewan as their province of residence                                                                                                                                                                                                                                                                                                                   | See Mortality data                                                                                                                                                                                                                                                                                                                                                                                                                                        |
| <b>Hospital Discharge (Hospitalization) data</b> | Saskatchewan Ministry of Health's year-end hospital files. | Data include all acute care inpatient and psychiatric inpatient hospitalizations. This data is based on total number of hospital discharges, irrespective of how many times the same individual is discharged. For example, one person could present five times in a fiscal year for a mental disorder, and it would be counted as five discharges. As well, a resident may be admitted to one hospital, and be transferred to another hospital which would count as two discharges, even though the individual was hospitalized for the same event. | ICD-9 codes are used for all hospital separations prior to 2000/01 fiscal year, and ICD-10 are used after this date. Some 2001-02 data and 1997-98 to 2003-04 are based on converted codes (to ICD-9 to ICD-10-CA). Differences between data coded in ICD-10 and ICD-9 occur for several reasons. The conversion tables are not perfect due to differences in the structure of the two coding systems. | All acute care inpatient and psychiatric inpatient hospitalizations of SHR residents in Saskatchewan and out-of-province/country hospitals.                                                                                                                                                                                                                                                                                                               |

|    |                                        |                                                             |                                                                                                                                                                                                                                                                                   |                                                                          |                                                                                                                                                                                                                                                                                                                                                                                                                                                                                                                                                                                                                                                                                                                                                                                                                                     |
|----|----------------------------------------|-------------------------------------------------------------|-----------------------------------------------------------------------------------------------------------------------------------------------------------------------------------------------------------------------------------------------------------------------------------|--------------------------------------------------------------------------|-------------------------------------------------------------------------------------------------------------------------------------------------------------------------------------------------------------------------------------------------------------------------------------------------------------------------------------------------------------------------------------------------------------------------------------------------------------------------------------------------------------------------------------------------------------------------------------------------------------------------------------------------------------------------------------------------------------------------------------------------------------------------------------------------------------------------------------|
| 1  | <b>Physician Billing data</b>          | Saskatchewan Ministry of Health's Medical Services Branch.  | Data include diagnosis codes that physicians use when patients come to see them. Diagnosis is in ICD-9 format for all years.                                                                                                                                                      | Only one diagnosis code is captured, and is of questionable data quality | Data is not captured for services by salaried physicians (approx. 30% of provincial physician supply).                                                                                                                                                                                                                                                                                                                                                                                                                                                                                                                                                                                                                                                                                                                              |
| 2  |                                        |                                                             |                                                                                                                                                                                                                                                                                   |                                                                          |                                                                                                                                                                                                                                                                                                                                                                                                                                                                                                                                                                                                                                                                                                                                                                                                                                     |
| 3  |                                        |                                                             |                                                                                                                                                                                                                                                                                   |                                                                          |                                                                                                                                                                                                                                                                                                                                                                                                                                                                                                                                                                                                                                                                                                                                                                                                                                     |
| 4  |                                        |                                                             |                                                                                                                                                                                                                                                                                   |                                                                          |                                                                                                                                                                                                                                                                                                                                                                                                                                                                                                                                                                                                                                                                                                                                                                                                                                     |
| 5  |                                        |                                                             |                                                                                                                                                                                                                                                                                   |                                                                          |                                                                                                                                                                                                                                                                                                                                                                                                                                                                                                                                                                                                                                                                                                                                                                                                                                     |
| 6  | <b>Sexually Transmitted Infections</b> | Ministry of Health, Integrated Public Health System (iPHIS) | Data include all new communicable diseases (CD) cases reportable to the Regional Health Authority under the Public Health Act, Reportable Disease Regulations, excluding reportable sexually transmitted infections (Chlamydia, gonorrhoea, syphilis), HIV/AIDS and tuberculosis. |                                                                          | Gross fluctuations in the trend over a short period of time may be an artefact. Changes in testing methodologies, changes and/or differences in case definitions, improved method of reporting (electronic versus paper), fluctuation in the population denominator, and recent change in the public interest in a particular disease can all affect the trends without there being an actual increase in the true rates. Similarly, calculated rates that are based on small numbers are more prone to fluctuation over time. Of over 37,000 children in both the 2010 and 2012 extracts born within our years of interest extract over 10,000 have a new address, this means that within 2 years about over 25% of the children will have moved at least once and may no longer be recorded in the their previous disparity area. |
| 7  |                                        |                                                             |                                                                                                                                                                                                                                                                                   |                                                                          |                                                                                                                                                                                                                                                                                                                                                                                                                                                                                                                                                                                                                                                                                                                                                                                                                                     |
| 8  |                                        |                                                             |                                                                                                                                                                                                                                                                                   |                                                                          |                                                                                                                                                                                                                                                                                                                                                                                                                                                                                                                                                                                                                                                                                                                                                                                                                                     |
| 9  |                                        |                                                             |                                                                                                                                                                                                                                                                                   |                                                                          |                                                                                                                                                                                                                                                                                                                                                                                                                                                                                                                                                                                                                                                                                                                                                                                                                                     |
| 10 |                                        |                                                             |                                                                                                                                                                                                                                                                                   |                                                                          |                                                                                                                                                                                                                                                                                                                                                                                                                                                                                                                                                                                                                                                                                                                                                                                                                                     |
| 11 |                                        |                                                             |                                                                                                                                                                                                                                                                                   |                                                                          |                                                                                                                                                                                                                                                                                                                                                                                                                                                                                                                                                                                                                                                                                                                                                                                                                                     |
| 12 |                                        |                                                             |                                                                                                                                                                                                                                                                                   |                                                                          |                                                                                                                                                                                                                                                                                                                                                                                                                                                                                                                                                                                                                                                                                                                                                                                                                                     |
| 13 |                                        |                                                             |                                                                                                                                                                                                                                                                                   |                                                                          |                                                                                                                                                                                                                                                                                                                                                                                                                                                                                                                                                                                                                                                                                                                                                                                                                                     |
| 14 |                                        |                                                             |                                                                                                                                                                                                                                                                                   |                                                                          |                                                                                                                                                                                                                                                                                                                                                                                                                                                                                                                                                                                                                                                                                                                                                                                                                                     |
| 15 |                                        |                                                             |                                                                                                                                                                                                                                                                                   |                                                                          |                                                                                                                                                                                                                                                                                                                                                                                                                                                                                                                                                                                                                                                                                                                                                                                                                                     |
| 16 |                                        |                                                             |                                                                                                                                                                                                                                                                                   |                                                                          |                                                                                                                                                                                                                                                                                                                                                                                                                                                                                                                                                                                                                                                                                                                                                                                                                                     |
| 17 |                                        |                                                             |                                                                                                                                                                                                                                                                                   |                                                                          |                                                                                                                                                                                                                                                                                                                                                                                                                                                                                                                                                                                                                                                                                                                                                                                                                                     |
| 18 |                                        |                                                             |                                                                                                                                                                                                                                                                                   |                                                                          |                                                                                                                                                                                                                                                                                                                                                                                                                                                                                                                                                                                                                                                                                                                                                                                                                                     |
| 19 |                                        |                                                             |                                                                                                                                                                                                                                                                                   |                                                                          |                                                                                                                                                                                                                                                                                                                                                                                                                                                                                                                                                                                                                                                                                                                                                                                                                                     |
| 20 |                                        |                                                             |                                                                                                                                                                                                                                                                                   |                                                                          |                                                                                                                                                                                                                                                                                                                                                                                                                                                                                                                                                                                                                                                                                                                                                                                                                                     |
| 21 |                                        |                                                             |                                                                                                                                                                                                                                                                                   |                                                                          |                                                                                                                                                                                                                                                                                                                                                                                                                                                                                                                                                                                                                                                                                                                                                                                                                                     |
| 22 | <b>Immunizations</b>                   | Saskatchewan Immunization Management System                 | Percent of children grouped by year turned 2 years of age, disparity quintile and gender who had received 2 doses of vaccine protective against measles, mumps and rubella by their second birthday.                                                                              |                                                                          |                                                                                                                                                                                                                                                                                                                                                                                                                                                                                                                                                                                                                                                                                                                                                                                                                                     |
| 23 |                                        |                                                             |                                                                                                                                                                                                                                                                                   |                                                                          |                                                                                                                                                                                                                                                                                                                                                                                                                                                                                                                                                                                                                                                                                                                                                                                                                                     |
| 24 |                                        |                                                             |                                                                                                                                                                                                                                                                                   |                                                                          |                                                                                                                                                                                                                                                                                                                                                                                                                                                                                                                                                                                                                                                                                                                                                                                                                                     |
| 25 |                                        |                                                             |                                                                                                                                                                                                                                                                                   |                                                                          |                                                                                                                                                                                                                                                                                                                                                                                                                                                                                                                                                                                                                                                                                                                                                                                                                                     |
| 26 |                                        |                                                             |                                                                                                                                                                                                                                                                                   |                                                                          |                                                                                                                                                                                                                                                                                                                                                                                                                                                                                                                                                                                                                                                                                                                                                                                                                                     |
| 27 |                                        |                                                             |                                                                                                                                                                                                                                                                                   |                                                                          |                                                                                                                                                                                                                                                                                                                                                                                                                                                                                                                                                                                                                                                                                                                                                                                                                                     |
| 28 |                                        |                                                             |                                                                                                                                                                                                                                                                                   |                                                                          |                                                                                                                                                                                                                                                                                                                                                                                                                                                                                                                                                                                                                                                                                                                                                                                                                                     |
| 29 |                                        |                                                             |                                                                                                                                                                                                                                                                                   |                                                                          |                                                                                                                                                                                                                                                                                                                                                                                                                                                                                                                                                                                                                                                                                                                                                                                                                                     |
| 30 |                                        |                                                             |                                                                                                                                                                                                                                                                                   |                                                                          |                                                                                                                                                                                                                                                                                                                                                                                                                                                                                                                                                                                                                                                                                                                                                                                                                                     |
| 31 |                                        |                                                             |                                                                                                                                                                                                                                                                                   |                                                                          |                                                                                                                                                                                                                                                                                                                                                                                                                                                                                                                                                                                                                                                                                                                                                                                                                                     |
| 32 |                                        |                                                             |                                                                                                                                                                                                                                                                                   |                                                                          |                                                                                                                                                                                                                                                                                                                                                                                                                                                                                                                                                                                                                                                                                                                                                                                                                                     |
| 33 |                                        |                                                             |                                                                                                                                                                                                                                                                                   |                                                                          |                                                                                                                                                                                                                                                                                                                                                                                                                                                                                                                                                                                                                                                                                                                                                                                                                                     |
| 34 |                                        |                                                             |                                                                                                                                                                                                                                                                                   |                                                                          |                                                                                                                                                                                                                                                                                                                                                                                                                                                                                                                                                                                                                                                                                                                                                                                                                                     |
| 35 |                                        |                                                             |                                                                                                                                                                                                                                                                                   |                                                                          |                                                                                                                                                                                                                                                                                                                                                                                                                                                                                                                                                                                                                                                                                                                                                                                                                                     |
| 36 |                                        |                                                             |                                                                                                                                                                                                                                                                                   |                                                                          |                                                                                                                                                                                                                                                                                                                                                                                                                                                                                                                                                                                                                                                                                                                                                                                                                                     |
| 37 |                                        |                                                             |                                                                                                                                                                                                                                                                                   |                                                                          |                                                                                                                                                                                                                                                                                                                                                                                                                                                                                                                                                                                                                                                                                                                                                                                                                                     |
| 38 |                                        |                                                             |                                                                                                                                                                                                                                                                                   |                                                                          |                                                                                                                                                                                                                                                                                                                                                                                                                                                                                                                                                                                                                                                                                                                                                                                                                                     |
| 39 |                                        |                                                             |                                                                                                                                                                                                                                                                                   |                                                                          |                                                                                                                                                                                                                                                                                                                                                                                                                                                                                                                                                                                                                                                                                                                                                                                                                                     |
| 40 |                                        |                                                             |                                                                                                                                                                                                                                                                                   |                                                                          |                                                                                                                                                                                                                                                                                                                                                                                                                                                                                                                                                                                                                                                                                                                                                                                                                                     |
| 41 |                                        |                                                             |                                                                                                                                                                                                                                                                                   |                                                                          |                                                                                                                                                                                                                                                                                                                                                                                                                                                                                                                                                                                                                                                                                                                                                                                                                                     |
| 42 |                                        |                                                             |                                                                                                                                                                                                                                                                                   |                                                                          |                                                                                                                                                                                                                                                                                                                                                                                                                                                                                                                                                                                                                                                                                                                                                                                                                                     |
| 43 |                                        |                                                             |                                                                                                                                                                                                                                                                                   |                                                                          |                                                                                                                                                                                                                                                                                                                                                                                                                                                                                                                                                                                                                                                                                                                                                                                                                                     |
| 44 |                                        |                                                             |                                                                                                                                                                                                                                                                                   |                                                                          |                                                                                                                                                                                                                                                                                                                                                                                                                                                                                                                                                                                                                                                                                                                                                                                                                                     |
| 45 |                                        |                                                             |                                                                                                                                                                                                                                                                                   |                                                                          |                                                                                                                                                                                                                                                                                                                                                                                                                                                                                                                                                                                                                                                                                                                                                                                                                                     |
| 46 |                                        |                                                             |                                                                                                                                                                                                                                                                                   |                                                                          |                                                                                                                                                                                                                                                                                                                                                                                                                                                                                                                                                                                                                                                                                                                                                                                                                                     |
| 47 |                                        |                                                             |                                                                                                                                                                                                                                                                                   |                                                                          |                                                                                                                                                                                                                                                                                                                                                                                                                                                                                                                                                                                                                                                                                                                                                                                                                                     |
| 48 |                                        |                                                             |                                                                                                                                                                                                                                                                                   |                                                                          |                                                                                                                                                                                                                                                                                                                                                                                                                                                                                                                                                                                                                                                                                                                                                                                                                                     |
| 49 |                                        |                                                             |                                                                                                                                                                                                                                                                                   |                                                                          |                                                                                                                                                                                                                                                                                                                                                                                                                                                                                                                                                                                                                                                                                                                                                                                                                                     |
| 50 |                                        |                                                             |                                                                                                                                                                                                                                                                                   |                                                                          |                                                                                                                                                                                                                                                                                                                                                                                                                                                                                                                                                                                                                                                                                                                                                                                                                                     |
| 51 |                                        |                                                             |                                                                                                                                                                                                                                                                                   |                                                                          |                                                                                                                                                                                                                                                                                                                                                                                                                                                                                                                                                                                                                                                                                                                                                                                                                                     |
| 52 |                                        |                                                             |                                                                                                                                                                                                                                                                                   |                                                                          |                                                                                                                                                                                                                                                                                                                                                                                                                                                                                                                                                                                                                                                                                                                                                                                                                                     |
| 53 |                                        |                                                             |                                                                                                                                                                                                                                                                                   |                                                                          |                                                                                                                                                                                                                                                                                                                                                                                                                                                                                                                                                                                                                                                                                                                                                                                                                                     |
| 54 |                                        |                                                             |                                                                                                                                                                                                                                                                                   |                                                                          |                                                                                                                                                                                                                                                                                                                                                                                                                                                                                                                                                                                                                                                                                                                                                                                                                                     |
| 55 |                                        |                                                             |                                                                                                                                                                                                                                                                                   |                                                                          |                                                                                                                                                                                                                                                                                                                                                                                                                                                                                                                                                                                                                                                                                                                                                                                                                                     |
| 56 |                                        |                                                             |                                                                                                                                                                                                                                                                                   |                                                                          |                                                                                                                                                                                                                                                                                                                                                                                                                                                                                                                                                                                                                                                                                                                                                                                                                                     |
| 57 |                                        |                                                             |                                                                                                                                                                                                                                                                                   |                                                                          |                                                                                                                                                                                                                                                                                                                                                                                                                                                                                                                                                                                                                                                                                                                                                                                                                                     |
| 58 |                                        |                                                             |                                                                                                                                                                                                                                                                                   |                                                                          |                                                                                                                                                                                                                                                                                                                                                                                                                                                                                                                                                                                                                                                                                                                                                                                                                                     |
| 59 |                                        |                                                             |                                                                                                                                                                                                                                                                                   |                                                                          |                                                                                                                                                                                                                                                                                                                                                                                                                                                                                                                                                                                                                                                                                                                                                                                                                                     |
| 60 |                                        |                                                             |                                                                                                                                                                                                                                                                                   |                                                                          |                                                                                                                                                                                                                                                                                                                                                                                                                                                                                                                                                                                                                                                                                                                                                                                                                                     |

1  
2  
3  
4  
5  
6  
7  
8  
9  
10  
11  
12  
13  
14  
15  
16  
17  
18  
19  
20  
21  
22  
23  
24  
25  
26  
27  
28  
29  
30  
31  
32  
33  
34  
35  
36  
37  
38  
39  
40  
41  
42  
43  
44  
45  
46  
47  
48  
49  
50  
51  
52  
53  
54  
55  
56  
57  
58  
59  
60

Appendix 2 – Matrix used for combining material and social indicators of the Pampalon index

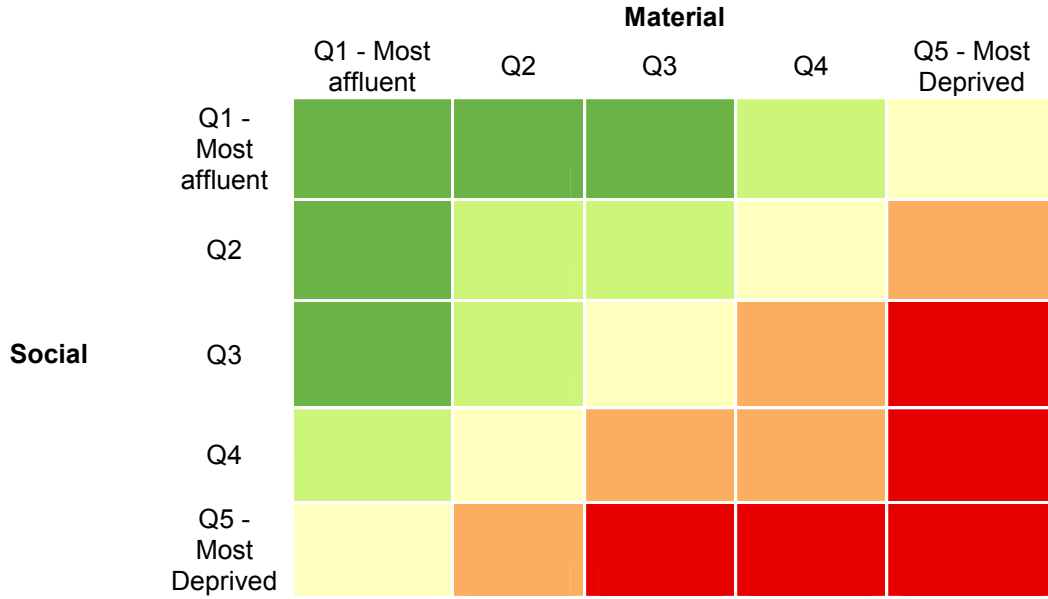

**Total Deprivation Scores**

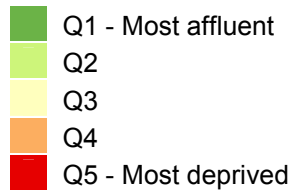

Appendix 3. Equations used for the calculation the cumulative proportion of population by deprivation quintile, the cumulative proportion of outcome by deprivation quintile, and the Gini coefficient.

### 1. Cumulative proportion of population by deprivation quintile

Equation 1:

$$x_k = \frac{\sum_{i=1}^k p_1}{P}$$

Where:

$$P = \sum_{i=1}^n p_1 = \text{Total population}$$

$$\sum_{i=1}^k p_1 = \text{Sum of population for all } i \text{ in } k$$

$$i = 1, \dots, k$$

$$k = 1, \dots, n$$

$$k = \begin{cases} Q5 & \text{if } i = 1 \\ Q4 & \text{if } i = 2 \\ Q3 & \text{if } i = 3 \\ Q2 & \text{if } i = 4 \\ Q1 & \text{if } i = 5 \end{cases}$$

The x-coordinates have the following properties:

$$0 < x_{Q5} < x_{Q4} < x_{Q3} < x_{Q2} < x_{Q1} = 1$$

### 2. Cumulative proportion of outcome by deprivation quintile

Equation 2:

$$y_k = \frac{\sum_{i=1}^k d_1}{D}$$

Where:

$$D = \sum_{i=1}^n d_1 = \text{Total disease cases}$$

$$\sum_{i=1}^k d_1 = \text{Sum of disease cases for all } i \text{ in } k$$

$$i = 1, \dots, k$$

$$k = 1, \dots, n$$

$$k = \begin{cases} Q5 & \text{if } i = 1 \\ Q4 & \text{if } i = 1 \\ Q3 & \text{if } i = 1 \\ Q2 & \text{if } i = 1 \\ Q1 & \text{if } i = 1 \end{cases}$$

The y-coordinates have the following properties:

$$0 < y_{Q5} < y_{Q4} < y_{Q3} < y_{Q2} < y_{Q1} = 1$$

### 3. Gini coefficient

Equation 3:

$$\text{Gini} = \frac{\text{Concentration Area}}{\text{Maximum Concentration Area (0.5)}}$$

Z = Area under the Lorenz curve

$$Z = \sum_i^n Z_k = \sum_i^n \frac{(y_k + y_{k-1})(x_k - x_{k-1})}{2}$$

$$\text{Gini} = \frac{\left( \sum_i^n \frac{(y_k + y_{k-1})(x_k - x_{k-1})}{2} \right) - 0.5}{0.5}$$
